# Supplementary material for: Ru(ii) complexes with N-heterocyclic carbene ligands or terpyridine analogues: synthesis, characterization, and electrochemical and proton-dependent spectrometric properties
Source: Royal Society of Chemistry journal article supplement (doi:10.1039/c2dt12283a), 2012-01-01

*Supporting Information of*

**Ru(II) Complexes with *N*-Heterocyclic Carbene  
Ligands or Terpyridine Analogues : Synthesis,  
Characterization, and Electrochemical and  
Proton-Dependent Spectrometric Properties.**

*Hee-Jun Park and Young Keun Chung\**

Intelligent Textile System Research Center, Department of Chemistry, College of  
Natural Sciences, Seoul National University, Seoul 151-747, Korea

\*Corresponding authors:

Young Keun Chung

(+82)-2-880-6662 (Tel); (+82)-2-889-0310 (Fax); [ykchung@snu.ac.kr](mailto:ykchung@snu.ac.kr)

**-CONTENTS-**

**Figure S1.** Electronic absorption changes of **BPPN** (upper) and **BPPT** (below).

**Figure S2.** Cyclic voltammograms of **BPT**, **BPN**, **BPPT**, and **BPPN**.

**Figure S3.** Solvatochromic properties of **BPN** with water and diethyl ether.

**Figure S4.** Absorption changes of **BPN** with various metal ions.

**Figure S5.**  $^1\text{H}$  and  $^{13}\text{C}$  NMR spectra of **BPN**.

**Figure S6.**  $^1\text{H}$  and  $^{13}\text{C}$  NMR spectra of **BPPN**.

**Figure S7.**  $^1\text{H}$  and  $^{13}\text{C}$  NMR spectra of **BPPT**.

**Figure S8.** Emission decay profiles.

**Figure S1.** Proton-dependent absorption changes of **BPPN**(upper) and **BPPT**(below). 1.0 M HCl in diethyl ether was used as a proton source. Recorded in  $1.0 \times 10^{-5}$  M solution in each case.

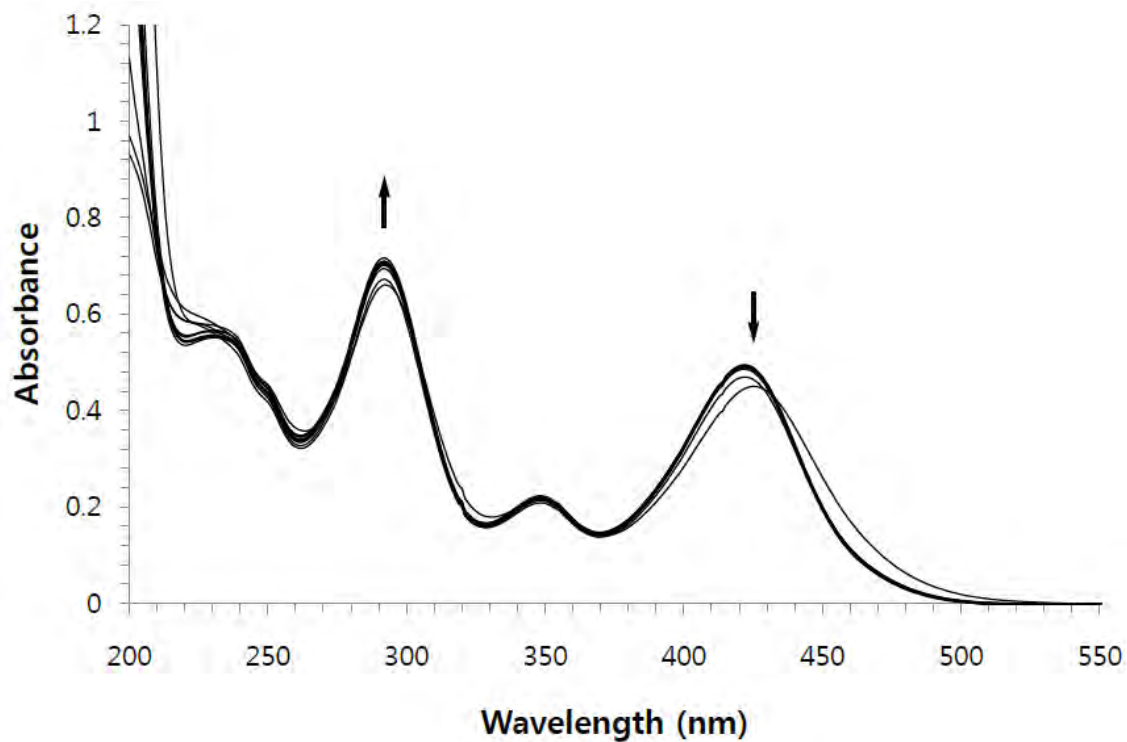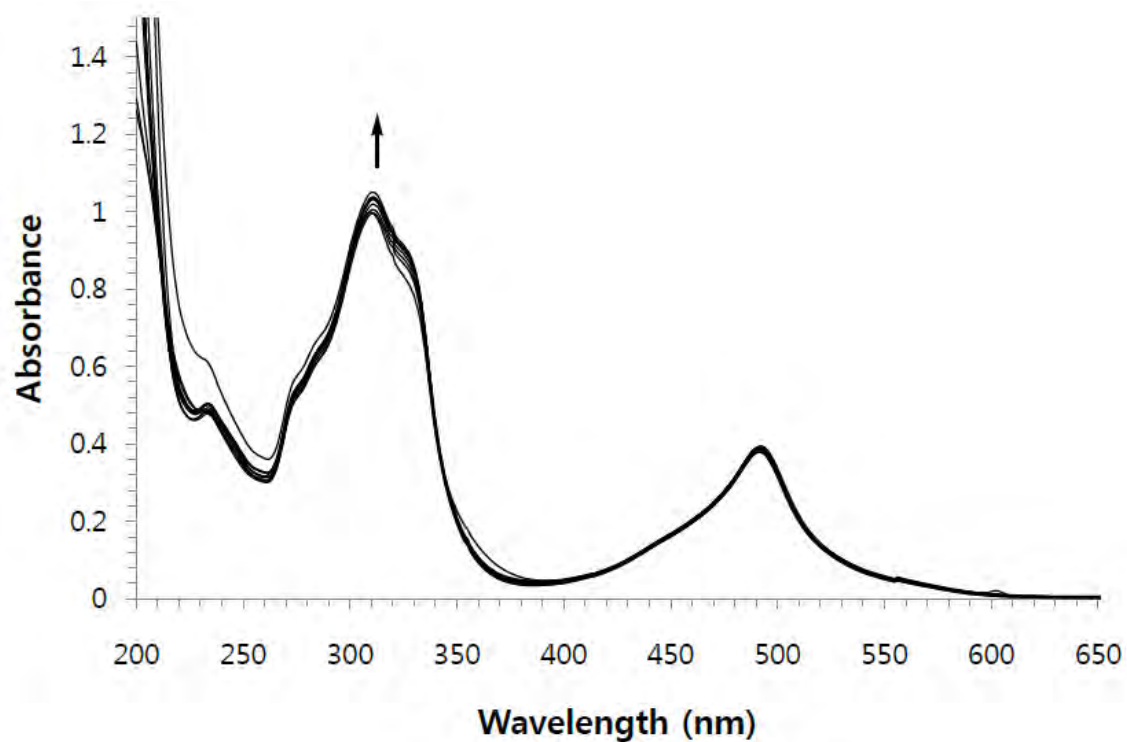

**Figure S2.** Cyclic voltammograms of **BPN**, **BPT**, **BPPT**, and **BPPN** in 0.1 M  $\text{Bu}_4\text{NPF}_6$  acetonitrile solution at room temperature.<sup>a</sup>

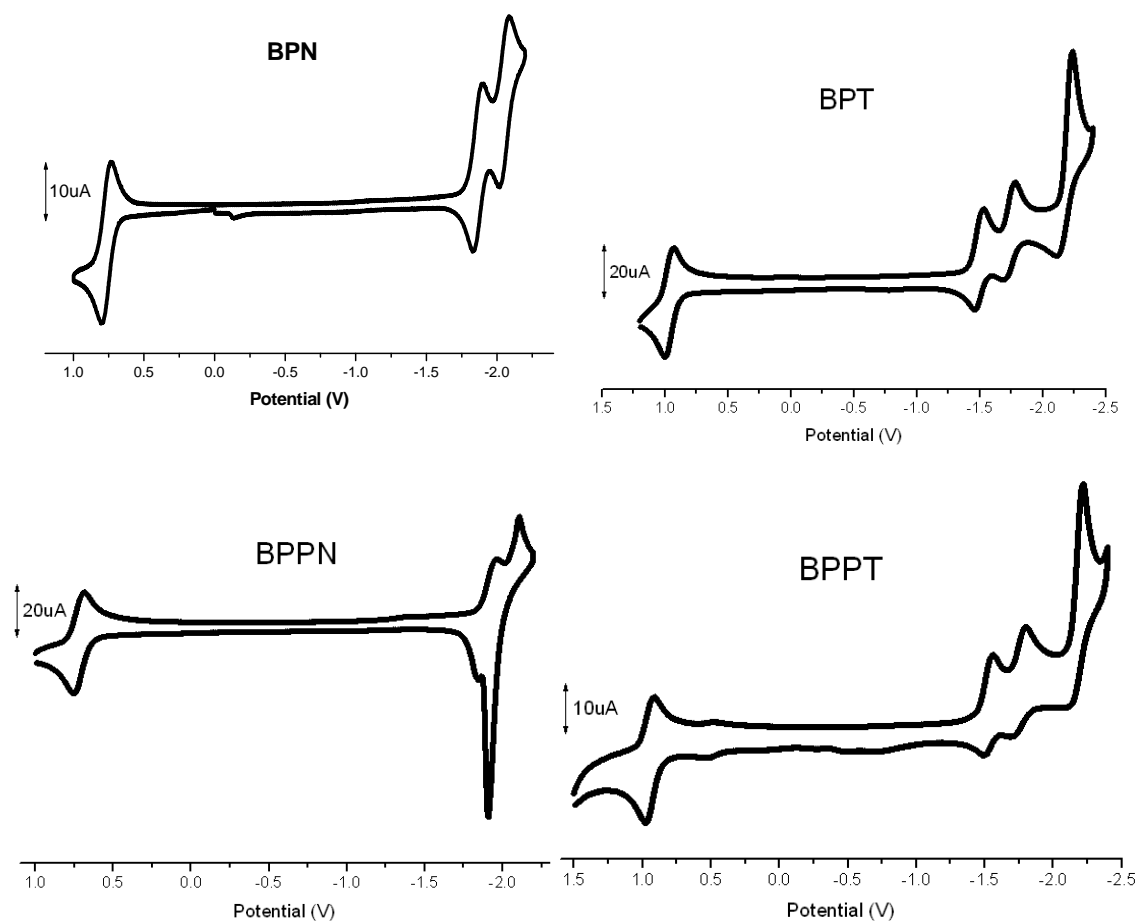

<sup>a</sup> In the complex **BPPN**, an abnormal reduction peak at around -1.85 is thought to be caused by adsorption of irreversibly reduced compound at the electrode surface.

**Figure S3.** Solvatochromic properties of **BPN**-acetonitrile solution (3 mL) with water and diethyl ether.

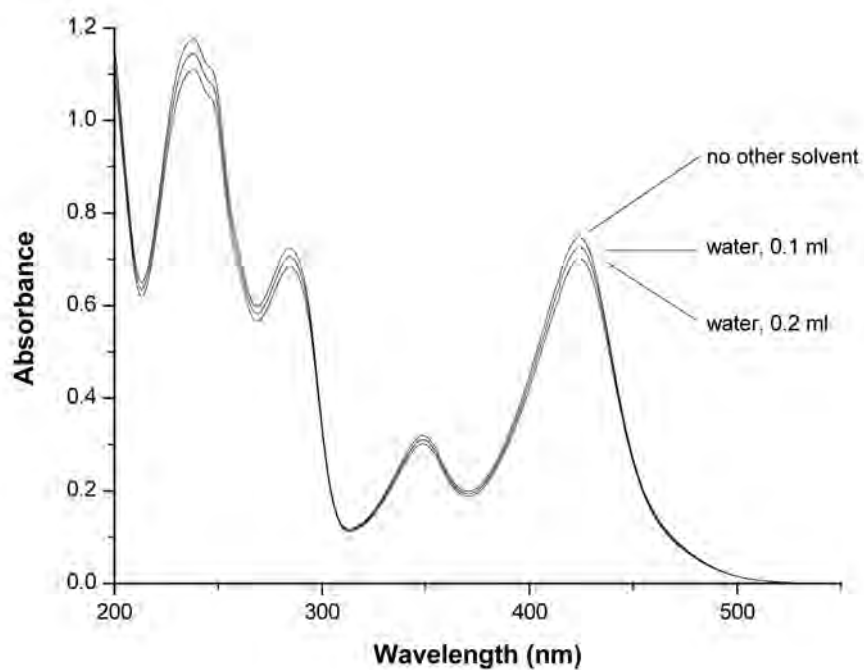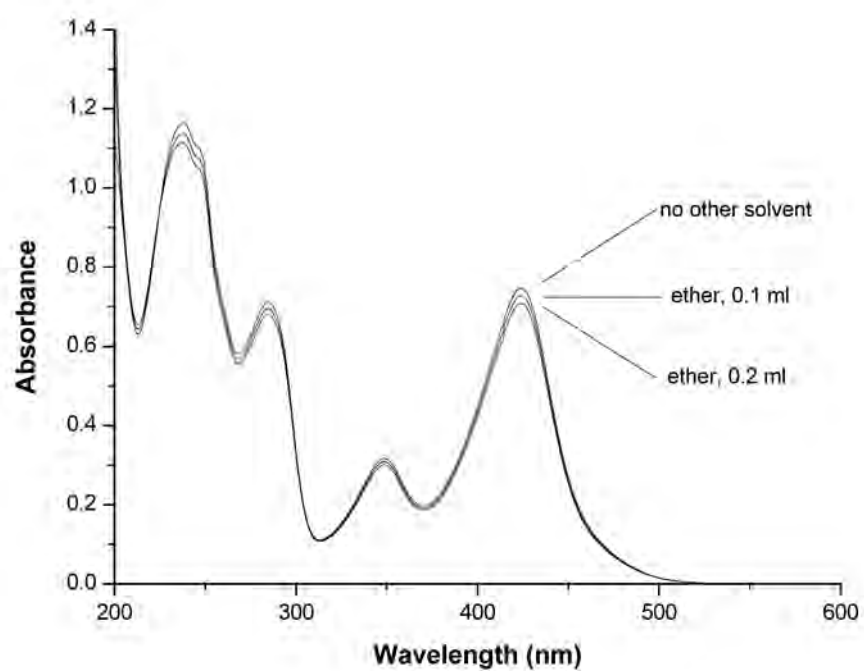

**Figure S4.** Absorption changes of **BPN** with various metal ions. **BPN**:  $1 \times 10^{-5}$  M, metal ion: 20 equiv.

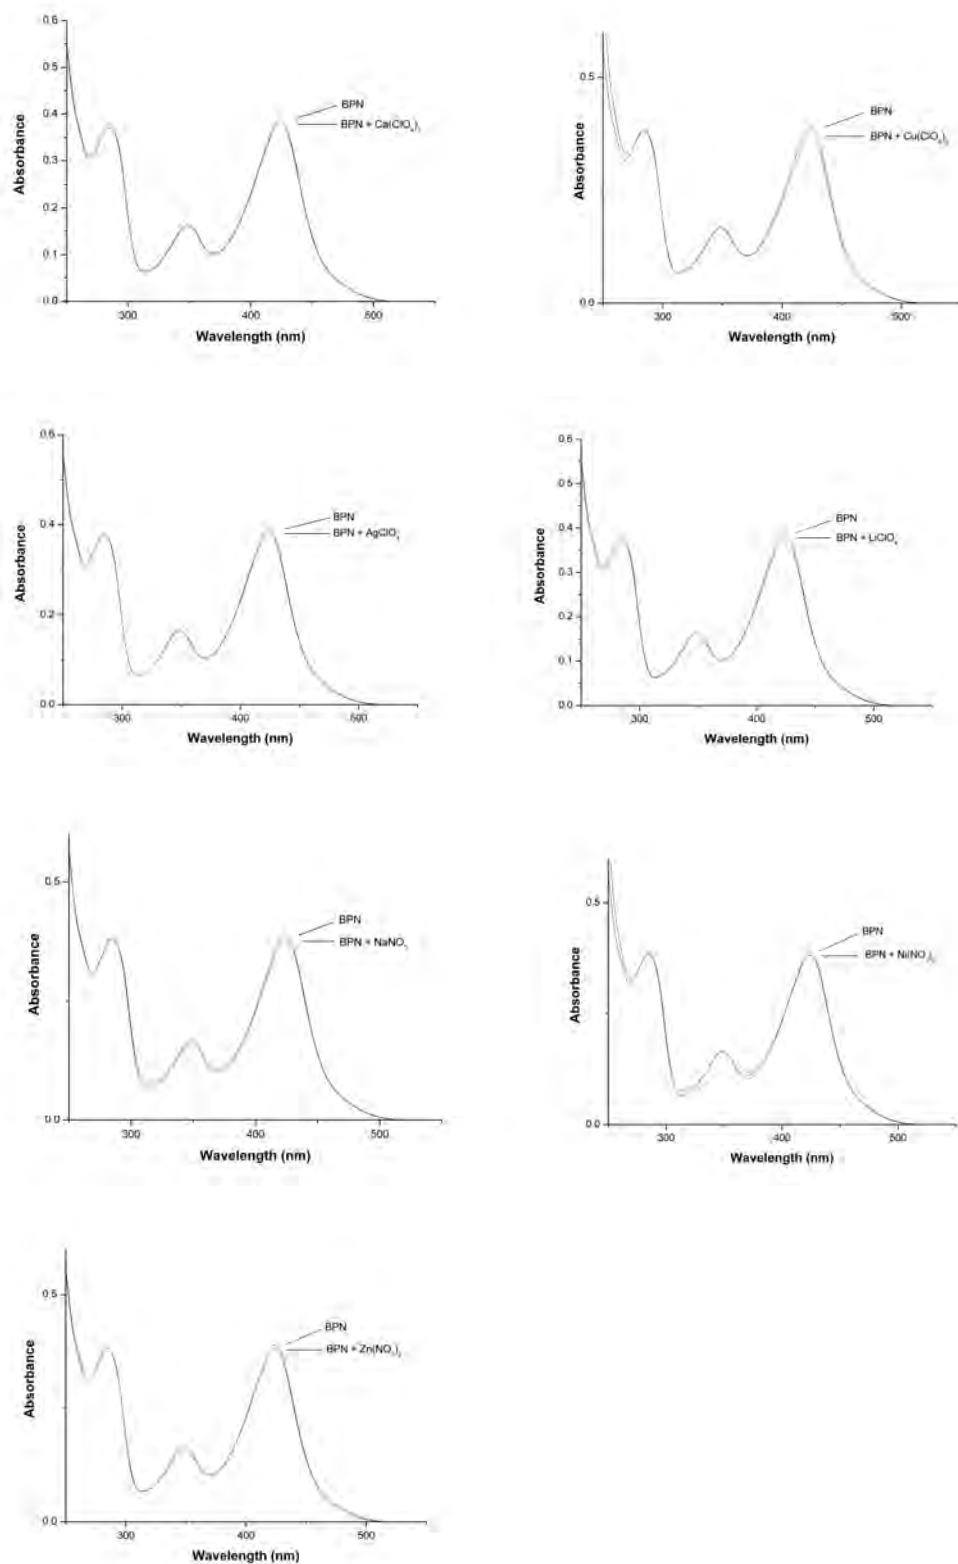

**Figure S5.**  $^1\text{H}$  and  $^{13}\text{C}$  NMR spectra of **BPN**.

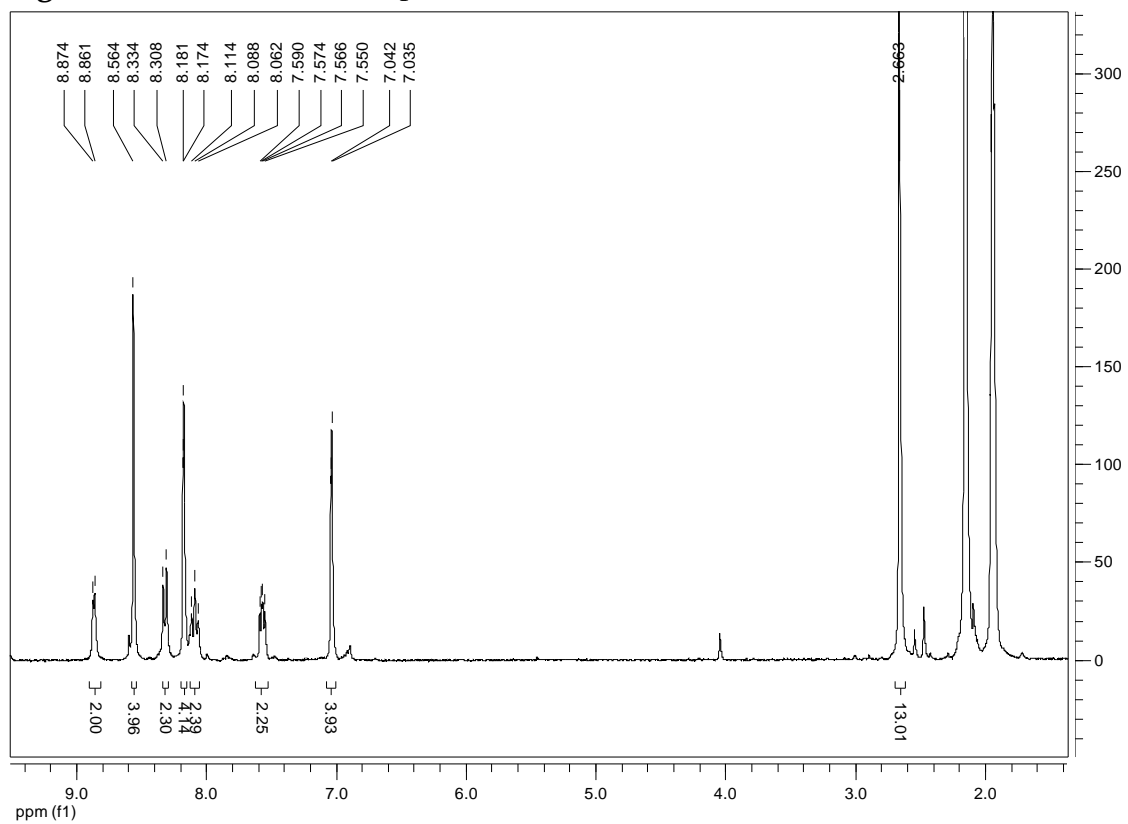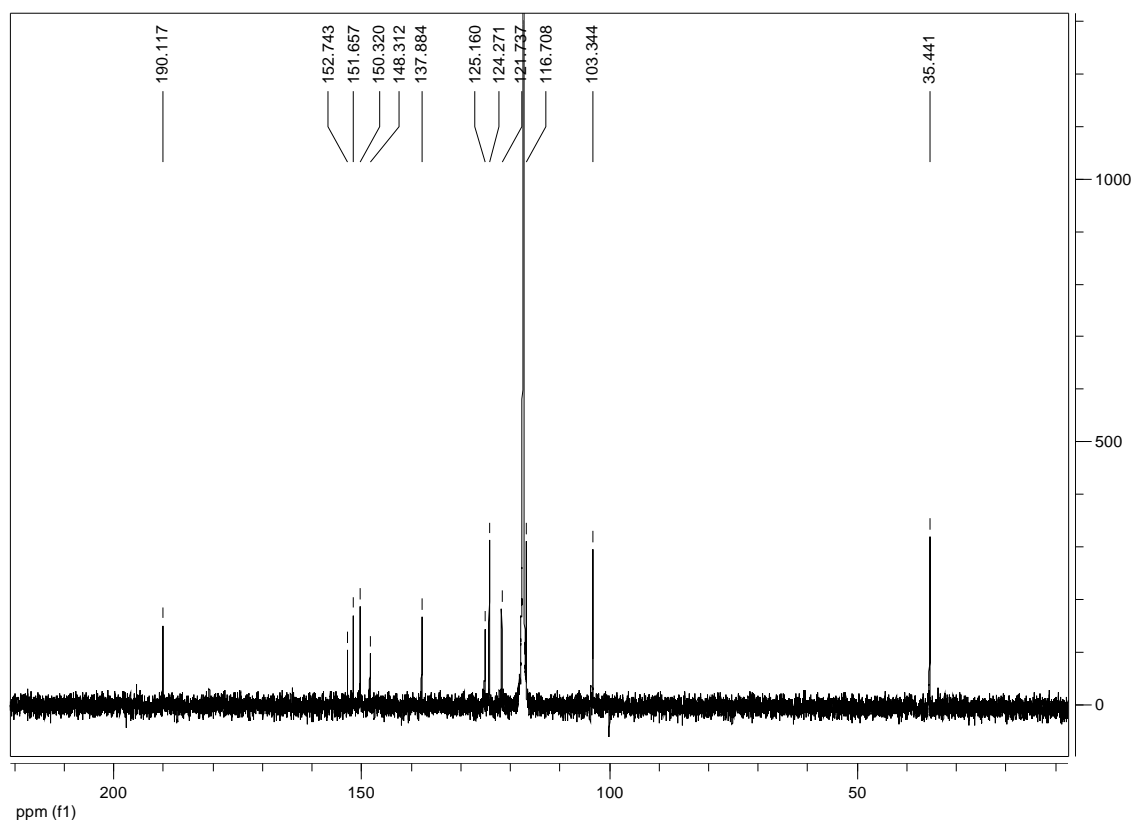

**Figure S6.**  $^1\text{H}$  and  $^{13}\text{C}$  NMR spectra of **BPPN**.

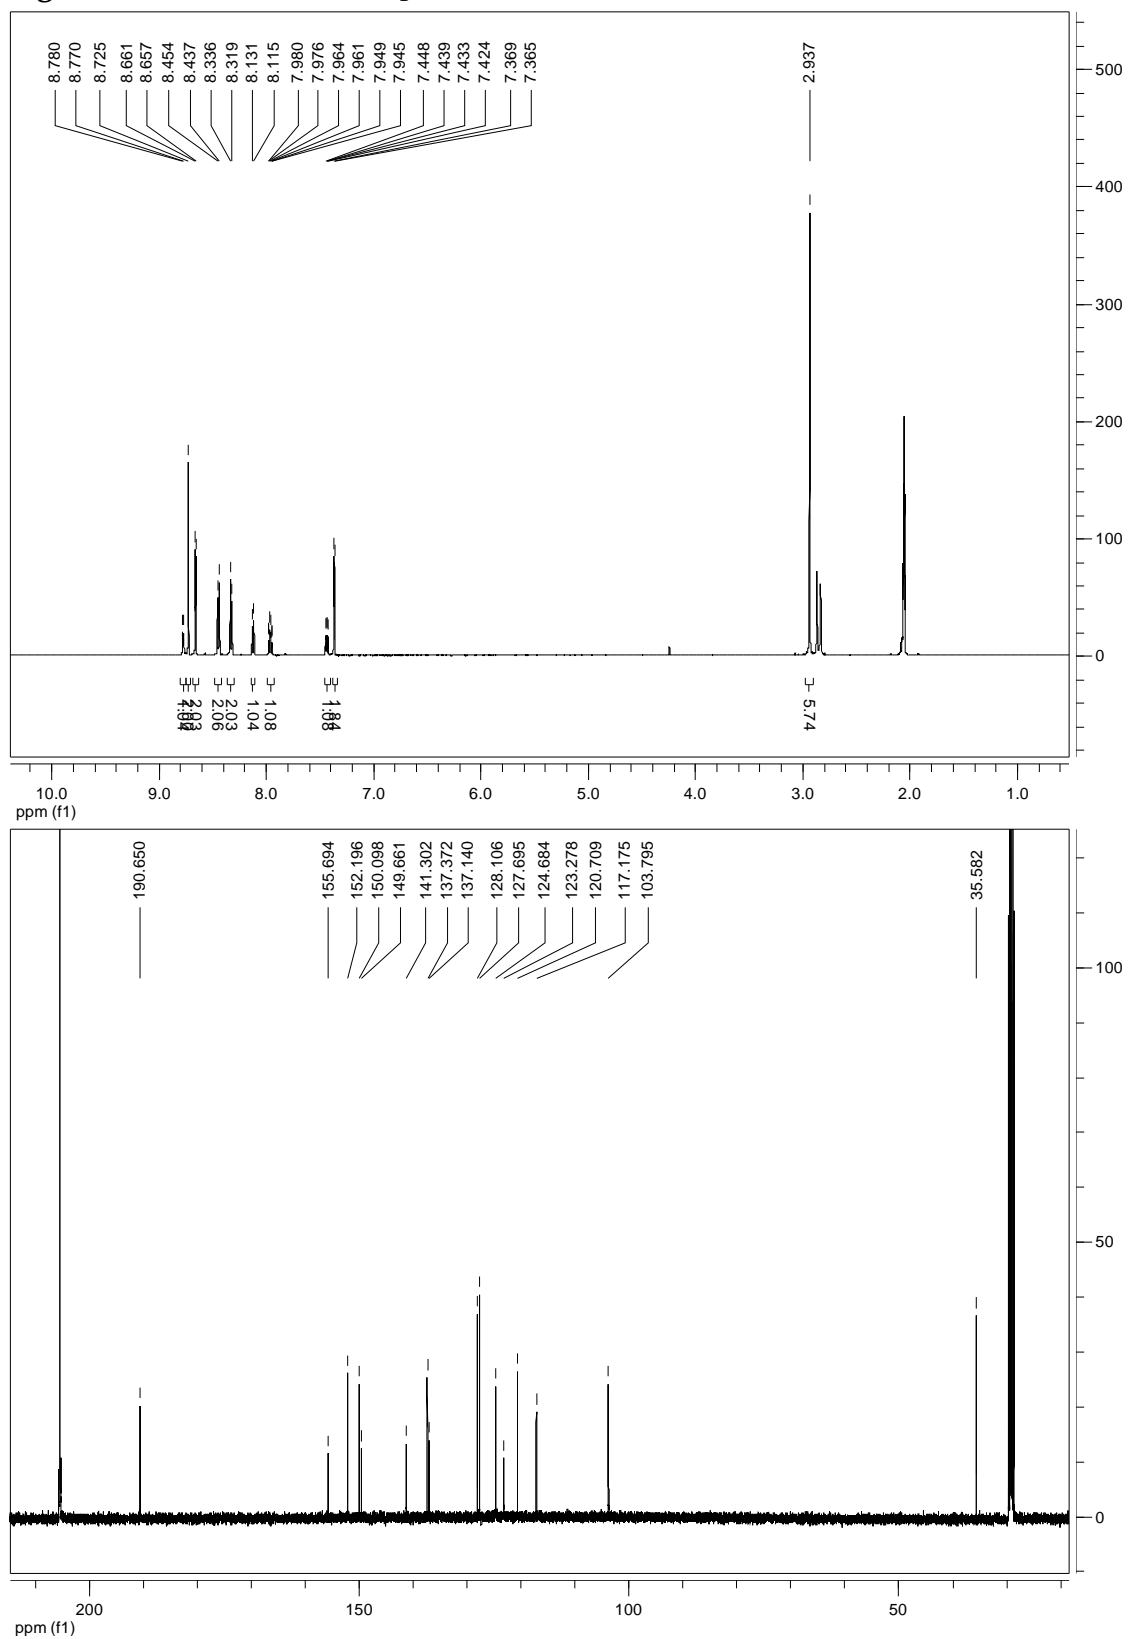



Figure S7.  $^1\text{H}$  and  $^{13}\text{C}$  NMR spectra of BPPT.

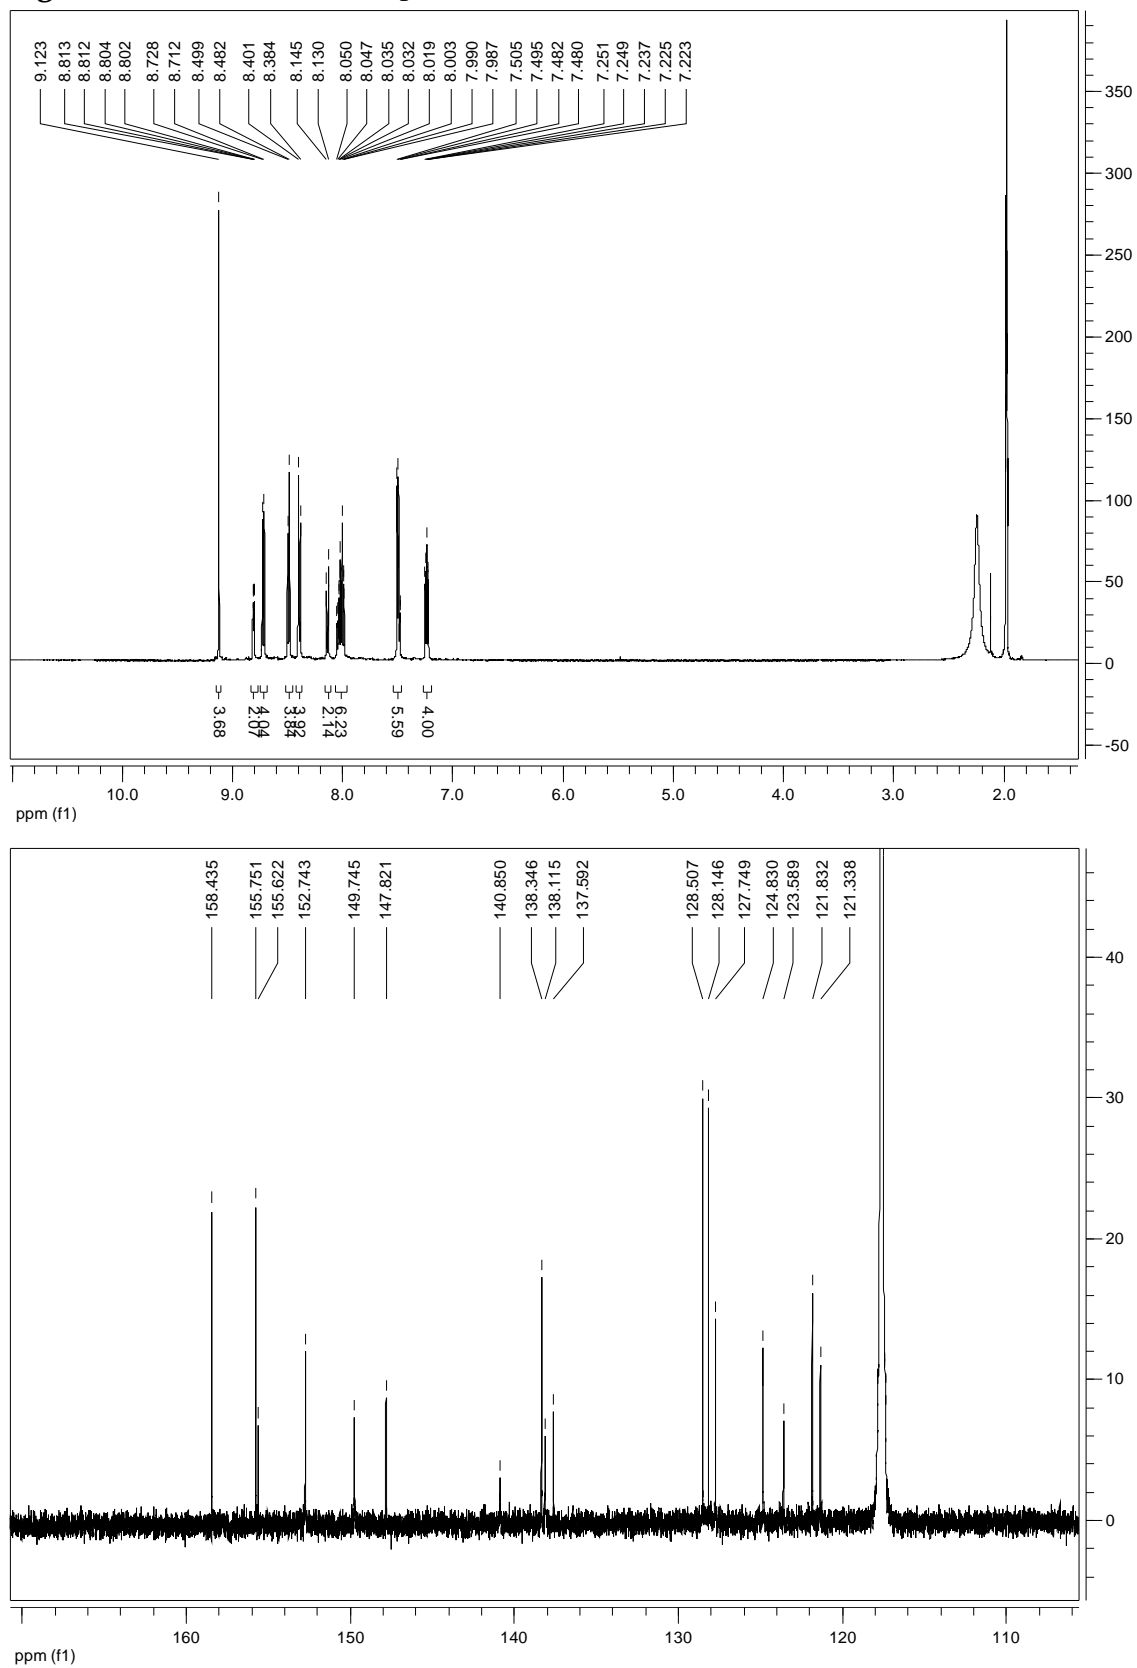

**Figure S8.** Emission decay profiles.

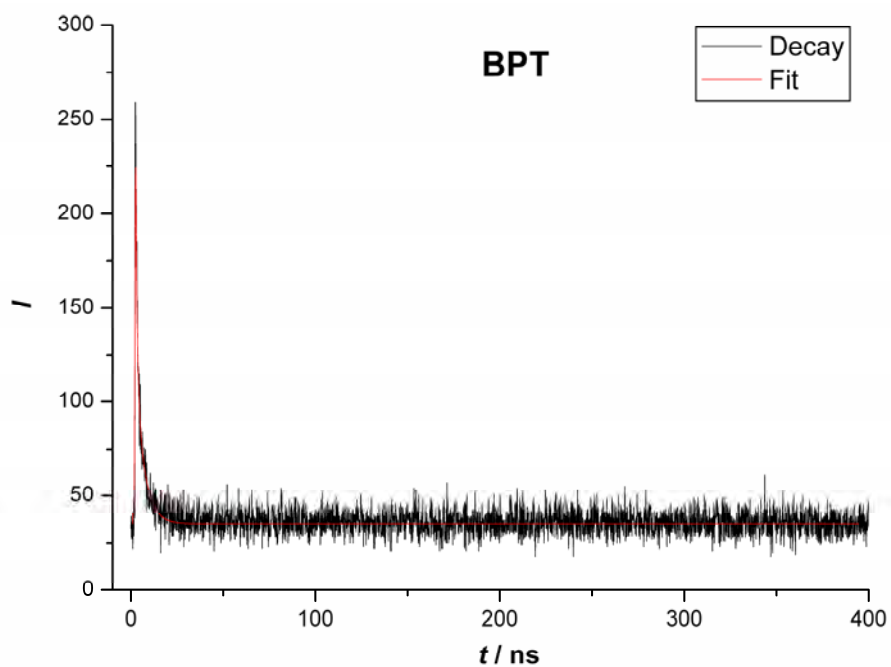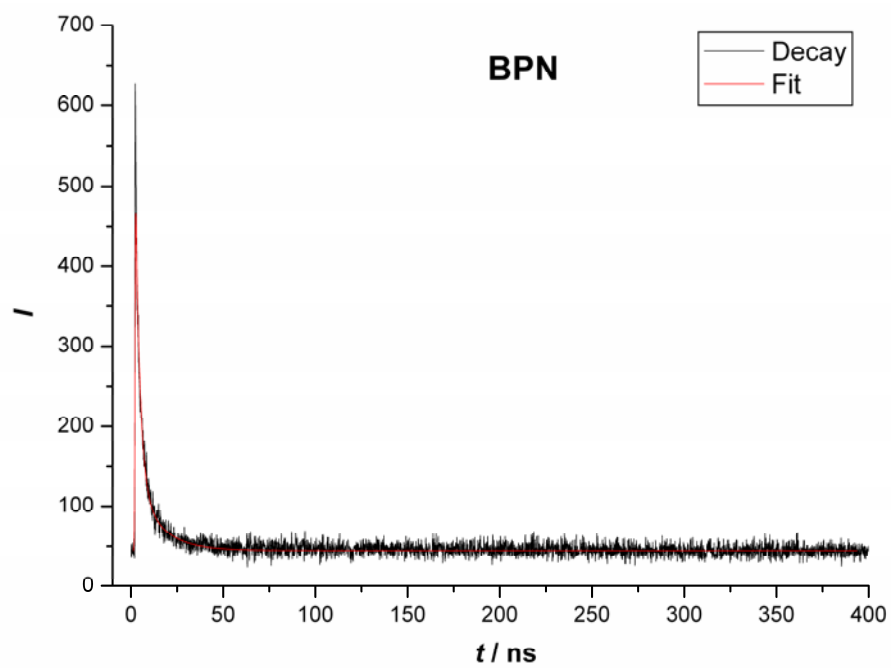

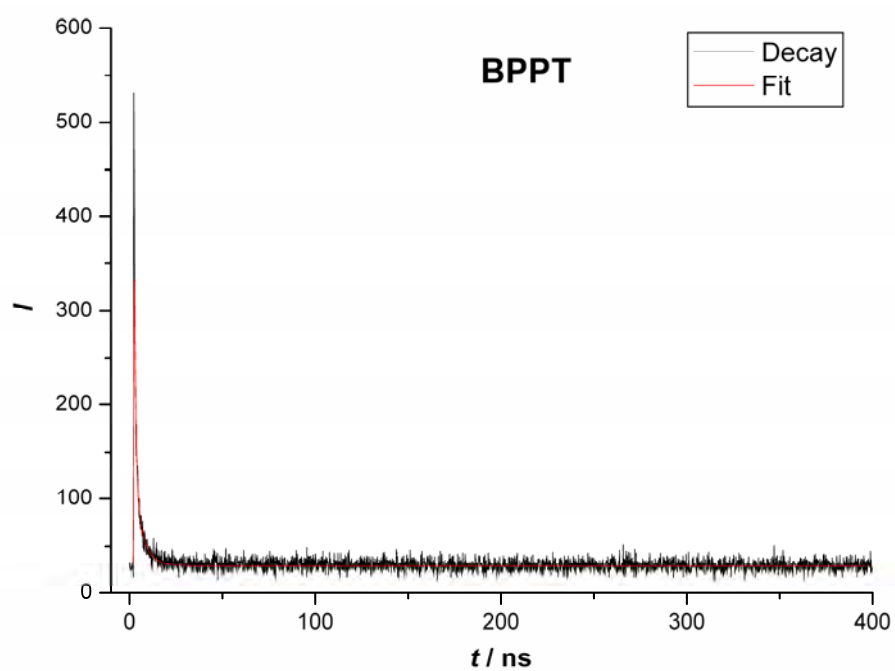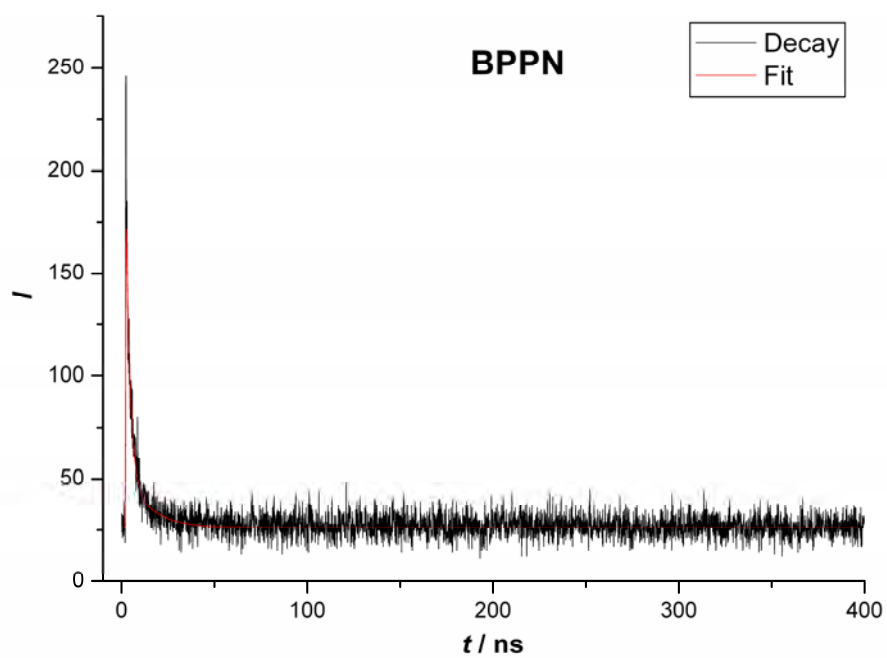

Supplement: c2dt12283a.pdf [file c2dt12283a.pdf]
